# Supplementary material
Source: PubMed Central journal article supplement (PMC4288674)
Supplement: JB.02085-14_zjb999093427so1.pdf [file JB.02085-14_zjb999093427so1.pdf]

**Supplemental Figure and Tables for:**

SS Kharade and MJ McBride. "*Flavobacterium johnsoniae* PorV is required for secretion of a subset of proteins targeted to the type IX secretion system"

Table S1. Primers used in this study

| Primers | Sequence and Description                                                                                                                                    |
|---------|-------------------------------------------------------------------------------------------------------------------------------------------------------------|
| 737     | 5'-AGGCACCCCAGGCTTTACACT-3'; Reverse primer binding downstream of multiple cloning site of pLYL03.                                                          |
| 948     | 5' - GCTAGGGATCCTCTTGCAGGCTCAACTACCGGAAT - 3'; Forward primer to construct pSSK01; BamHI site underlined                                                    |
| 949     | 5' - GCTAGGTCGACCTTTTCGCTTGCCAAACCGTCTTCA - 3'; Reverse primer to construct pSSK01; Sall site underlined                                                    |
| 972     | 5' - GCTAGGCATGC TACGTGGGACGGAAGGGATGATTT - 3'; Forward primer used for constructing pSSK03; SphI site underlined                                           |
| 973     | 5' - GCTAGGGTACCCCTGAGAAAGCTCATTGATGGTGTCTG - 3'; Reverse primer to construct pSSK03; KpnI site underlined                                                  |
| 988     | 5' - GCTAGTCTAGAGCCGTGCCCAACATCAATACCATT - 3'; Forward primer used for constructing pSSK04; XbaI site underlined                                            |
| 989     | 5' - GCTAGGGATCCAGTTGCAACACCCTGGTCTCCTAA - 3'; Reverse primer to construct pSSK04; BamHI site underlined                                                    |
| 1102    | 5' - GCTAGGGATCCGCAAACACTTCGAACTTCGTA - 3'; Forward primer to amplify upstream region of <i>Fjoh_0288</i> to construct pSSK16; BamHI site underlined        |
| 1103    | 5' - GCTAGTCTAGAGGCATCGACACCAATATTCAT - 3'; Reverse primer to amplify upstream region of <i>Fjoh_0288</i> to construct pSSK16; XbaI site underlined         |
| 1104    | 5' - GCTAGTCTAGAGCTTTGTACTCAAATATTTTTTCGATA - 3'; Forward primer to amplify downstream region of <i>Fjoh_0288</i> to construct pSSK14; XbaI site underlined |
| 1105    | 5' - GCTAGGTCGACCAGTTTTATCGCCTGAGCTTC - 3'; Reverse primer to amplify downstream region of <i>Fjoh_0288</i> to construct pSSK14; Sall site underlined       |
| 1201    | 5' - GCTAGGTCGACTACCACGAAAGCCCTATGAAAGGA - 3'; Forward primer to amplify downstream region of <i>porV</i> to construct pSSK22; Sall site underlined         |
| 1202    | 5' - GCTAGGCATGCCTCCTTCAGCTACTGTATCACCAAC-3'; Reverse primer to amplify downstream region of <i>porV</i> to construct pSSK22; SphI site underlined          |
| 1203    | 5' - GCTAGGGATCCTGCCATTGATGCGTCTGACTAC - 3'; Forward primer to amplify upstream region of <i>porV</i> to construct pSSK20; BamHI site underlined            |
| 1204    | 5' - GCTAGGTCGACAGGGCGCTCAATATCTTGGGCTTT - 3'; Reverse primer to amplify upstream region of <i>porV</i> to construct pSSK20; Sall site underlined           |
| 1205    | 5' - GCTAGGTCGACGATTTTGGCGACCGGATTGGAAAAGGA - 3'; Forward primer to amplify downstream region of <i>porU</i> to construct pSSK23; Sall site underlined      |
| 1206    | 5' - GCTAGGCATGCCCATACCAATTGGCTGAACGTGGT - 3'; Reverse primer to amplify downstream region of <i>porU</i> to construct pSSK23; SphI site underlined         |
| 1207    | 5' - GCTAGGGATCCCGACAGTTCCTGCAGTGTTCCTAAGC-3'; Forward primer to amplify upstream region of <i>porU</i> to construct pSSK21; BamHI site underlined          |
| 1208    | 5' - GCTAGGTCGACAAAGTATGCGATCAGGGCTTGTTTCAT - 3'; Reverse primer to amplify upstream region of <i>porU</i> to construct pSSK21; Sall site underlined        |

Table S2. Bacteriophage sensitivity of *F. johnsoniae* wild-type and mutant strains<sup>a</sup>.

| Phage<br>Host Strain  | φCj1<br>pfu/ml        | φCj13<br>pfu/ml       | φCj23<br>pfu/ml       | φCj28<br>pfu/ml       | φCj29<br>pfu/ml       | φCj42<br>pfu/ml       | φCj48<br>pfu/ml       | φCj54<br>pfu/ml       |
|-----------------------|-----------------------|-----------------------|-----------------------|-----------------------|-----------------------|-----------------------|-----------------------|-----------------------|
| WT (CJ1827)           | 1.5 x 10 <sup>8</sup> | 1.6 x 10 <sup>8</sup> | 1.5 x 10 <sup>8</sup> | 1.7 x 10 <sup>9</sup> | 1.5 x 10 <sup>9</sup> | 1.7 x 10 <sup>9</sup> | 1.7 x 10 <sup>9</sup> | 1.7 x 10 <sup>9</sup> |
| <i>ΔporU</i>          | 1.5 x 10 <sup>8</sup> | 1.5 x 10 <sup>8</sup> | 1.5 x 10 <sup>8</sup> | 1.7 x 10 <sup>9</sup> | 1.4 x 10 <sup>9</sup> | 1.6 x 10 <sup>9</sup> | 1.6 x 10 <sup>9</sup> | 1.7 x 10 <sup>9</sup> |
| <i>ΔporV</i>          | 1.4 x 10 <sup>8</sup> | 1.4 x 10 <sup>8</sup> | 1.5 x 10 <sup>8</sup> | 1.7 x 10 <sup>9</sup> | 1.1 x 10 <sup>9</sup> | 1.3 x 10 <sup>9</sup> | < 10                  | < 10                  |
| <i>ΔporV</i> + pSSK03 | 1.5 x 10 <sup>8</sup> | 1.5 x 10 <sup>8</sup> | 1.5 x 10 <sup>8</sup> | 1.7 x 10 <sup>9</sup> | 1.4 x 10 <sup>9</sup> | 1.6 x 10 <sup>9</sup> | 1.6 x 10 <sup>9</sup> | 1.7 x 10 <sup>9</sup> |
| <i>ΔremA</i>          | 1.5 x 10 <sup>8</sup> | 1.5 x 10 <sup>8</sup> | 1.5 x 10 <sup>8</sup> | 1.7 x 10 <sup>9</sup> | 1.5 x 10 <sup>9</sup> | 1.5 x 10 <sup>9</sup> | 1.5 x 10 <sup>9</sup> | 1.6 x 10 <sup>9</sup> |
| <i>ΔsprB</i>          | < 10                  | 1.2 x 10 <sup>3</sup> | < 10                  | 1.7 x 10 <sup>9</sup> | 1.0 x 10 <sup>9</sup> | 1.7 x 10 <sup>9</sup> | 1.6 x 10 <sup>9</sup> | 1.7 x 10 <sup>9</sup> |
| <i>ΔremA ΔsprB</i>    | < 10                  | 1.1 x 10 <sup>3</sup> | < 10                  | 1.7 x 10 <sup>9</sup> | 1.0 x 10 <sup>9</sup> | 1.4 x 10 <sup>9</sup> | 1.5 x 10 <sup>9</sup> | 1.6 x 10 <sup>9</sup> |
| <i>ΔporV ΔsprB</i>    | < 10                  | < 10                  | < 10                  | 1.7 x 10 <sup>9</sup> | < 10                  | < 10                  | < 10                  | < 10                  |
| <i>ΔgldNO</i>         | < 10                  | < 10                  | < 10                  | < 10                  | < 10                  | < 10                  | < 10                  | < 10                  |

<sup>a</sup> Each phage stock was serially diluted, mixed with cells of *F. johnsoniae*, plated on CYE agar in CYE overlay agar, incubated 24 h at 25°C, and the number of plaque forming units (pfu) per ml of original phage stock was determined on each bacterial strain. '<10' indicates that no plaques were observed even when 0.1 ml of undiluted phage stock was tested. 'WT' indicates the streptomycin resistant *rpsI2* strain CJ1827, which is wild-type for secretion and motility and was used to construct deletion mutants. *ΔporU*, CJ2116. *ΔporV*, CJ2130. *ΔremA*, CJ1984. *ΔsprB*, CJ1922. *ΔremA ΔsprB*, CJ1985. *ΔporV ΔsprB*, CJ2445. *ΔgldNO*, CJ2090. pSSK03 carries *porV* and was used to complement the *ΔporV* mutant.

Table S3. Proteins identified in cell-free culture fluid by SDS-PAGE followed by LC-MS/MS analysis of the 60-240 kDa range<sup>a</sup>.

| <b>Proteins secreted by the T9SS: These 33 proteins were absent or greatly decreased in culture fluid of <i>ΔgldNO</i> mutant cells and were restored by complementation with pTB79.</b> |                  |                                         |           |               |                       |              |                       |              |                       |
|------------------------------------------------------------------------------------------------------------------------------------------------------------------------------------------|------------------|-----------------------------------------|-----------|---------------|-----------------------|--------------|-----------------------|--------------|-----------------------|
| Locus tag/Protein name                                                                                                                                                                   | CTD <sup>b</sup> | Predicted protein function <sup>c</sup> | Wild type | <i>ΔgldNO</i> | <i>ΔgldNO</i> + pTB79 | <i>ΔporV</i> | <i>ΔporV</i> + pSSK03 | <i>ΔporU</i> | <i>ΔporU</i> + pSSK04 |
| Fjoh_0074                                                                                                                                                                                | TIGR04183        | nuclease/phosphatase                    | 42        | 3             | 108                   | 7            | 84                    | 95           | 129                   |
| Fjoh_0601                                                                                                                                                                                |                  |                                         | 115       | 0             | 84                    | 71           | 78                    | 118          | 148                   |
| Fjoh_0602                                                                                                                                                                                |                  |                                         | 68        | 0             | 38                    | 57           | 59                    | 65           | 86                    |
| Fjoh_0604                                                                                                                                                                                |                  |                                         | 47        | 0             | 39                    | 42           | 44                    | 40           | 45                    |
| Fjoh_0606                                                                                                                                                                                |                  |                                         | 163       | 0             | 172                   | 77           | 169                   | 176          | 198                   |
| Fjoh_0808/<br>RemA                                                                                                                                                                       | TIGR04183        | motility adhesin                        | 38        | 0             | 47                    | 0            | 56                    | 37           | 67                    |
| Fjoh_0886                                                                                                                                                                                | TIGR04183        | peptidase                               | 12        | 0             | 19                    | 0            | 21                    | 14           | 18                    |
| Fjoh_1022                                                                                                                                                                                | TIGR04183        | licheninase                             | 6         | 0             | 6                     | 0            | 6                     | 1            | 8                     |
| Fjoh_1123                                                                                                                                                                                | TIGR04131        |                                         | 34        | 0             | 10                    | 27           | 3                     | 37           | 32                    |
| Fjoh_1188                                                                                                                                                                                | TIGR04183        |                                         | 49        | 0             | 104                   | 0            | 42                    | 52           | 75                    |
| Fjoh_1189                                                                                                                                                                                | TIGR04183        | lectin                                  | 74        | 0             | 112                   | 1            | 69                    | 112          | 79                    |
| Fjoh_1208                                                                                                                                                                                | TIGR04183        | α amylase                               | 45        | 0             | 66                    | 6            | 91                    | 58           | 126                   |
| Fjoh_1231                                                                                                                                                                                | TIGR04183        | pectate lyase                           | 9         | 0             | 13                    | 0            | 6                     | 35           | 31                    |
| Fjoh_1269                                                                                                                                                                                | TIGR04183        |                                         | 27        | 4             | 43                    | 3            | 40                    | 34           | 56                    |
| Fjoh_1408 <sup>d</sup>                                                                                                                                                                   | TIGR04183        | α amylase                               | 2         | 0             | 4                     | 0            | 2                     | 0            | 6                     |
| Fjoh_1645 <sup>d</sup>                                                                                                                                                                   | TIGR04131        |                                         | 2         | 0             | 6                     | 0            | 1                     | 2            | 3                     |
| Fjoh_2150                                                                                                                                                                                | TIGR04183        |                                         | 6         | 0             | 6                     | 0            | 7                     | 3            | 3                     |
| Fjoh_2273                                                                                                                                                                                | TIGR04131        |                                         | 4         | 0             | 5                     | 1            | 5                     | 5            | 1                     |
| Fjoh_2389 <sup>d</sup>                                                                                                                                                                   | TIGR04183        | peptidase                               | 2         | 0             | 7                     | 0            | 12                    | 0            | 6                     |
| Fjoh_2667                                                                                                                                                                                |                  |                                         | 28        | 0             | 7                     | 0            | 3                     | 5            | 33                    |
| Fjoh_2687                                                                                                                                                                                |                  |                                         | 26        | 1             | 26                    | 7            | 35                    | 26           | 43                    |
| Fjoh_3108                                                                                                                                                                                |                  |                                         | 7         | 0             | 10                    | 0            | 8                     | 0            | 10                    |
| Fjoh_3246                                                                                                                                                                                | TIGR04183        |                                         | 12        | 0             | 77                    | 0            | 6                     | 23           | 41                    |
| Fjoh_3324                                                                                                                                                                                | TIGR04183        | carbohydrate-binding                    | 16        | 1             | 40                    | 5            | 20                    | 49           | 59                    |
| Fjoh_3729                                                                                                                                                                                |                  |                                         | 46        | 0             | 32                    | 0            | 52                    | 23           | 79                    |
| Fjoh_3777                                                                                                                                                                                | TIGR04183        | deacylase                               | 10        | 0             | 25                    | 0            | 9                     | 10           | 34                    |
| Fjoh_3952                                                                                                                                                                                | TIGR04131        |                                         | 22        | 0             | 11                    | 12           | 16                    | 11           | 17                    |

|           |           |                           |    |   |    |    |    |     |    |
|-----------|-----------|---------------------------|----|---|----|----|----|-----|----|
| Fjoh_4174 | TIGR04183 | carbohydrate-binding,     | 40 | 5 | 40 | 6  | 62 | 55  | 36 |
| Fjoh_4176 | TIGR04183 | carbohydrate-binding,     | 48 | 3 | 65 | 7  | 63 | 108 | 76 |
| Fjoh_4177 | TIGR04183 | glycoside hydrolase, GH16 | 22 | 0 | 35 | 0  | 34 | 67  | 60 |
| Fjoh_4750 | TIGR04131 |                           | 13 | 0 | 3  | 3  | 3  | 3   | 10 |
| Fjoh_4819 |           | glycoside hydrolase, GH3  | 34 | 0 | 5  | 0  | 1  | 12  | 9  |
| Fjoh_4934 | TIGR04131 |                           | 11 | 1 | 7  | 19 | 4  | 17  | 17 |

**Proteins that may be secreted by the T9SS but for which the LC/MS data were inconclusive either because the proteins were abundant in the cell-free culture fluid of the  $\Delta$ *gldNO* mutant, or because of lack of complementation by pTB79.**

| Locus tag/Protein name          | CTD <sup>b</sup> | Predicted protein function <sup>c</sup>   | Wild type | $\Delta$ <i>gldNO</i> | $\Delta$ <i>gldNO</i> + pTB79 | $\Delta$ <i>porV</i> | $\Delta$ <i>porV</i> + pSSK03 | $\Delta$ <i>porU</i> | $\Delta$ <i>porU</i> + pSSK04 |
|---------------------------------|------------------|-------------------------------------------|-----------|-----------------------|-------------------------------|----------------------|-------------------------------|----------------------|-------------------------------|
| Fjoh_0119                       |                  | peptidase                                 | 24        | 1                     | 2                             | 6                    | 0                             | 3                    | 5                             |
| Fjoh_0200                       |                  |                                           | 27        | 3                     | 1                             | 2                    | 2                             | 2                    | 1                             |
| Fjoh_0416                       |                  |                                           | 449       | 85                    | 50                            | 104                  | 58                            | 102                  | 114                           |
| Fjoh_0488                       |                  |                                           | 31        | 14                    | 1                             | 16                   | 5                             | 4                    | 8                             |
| Fjoh_0636                       |                  | peptidase                                 | 89        | 21                    | 14                            | 29                   | 19                            | 21                   | 29                            |
| Fjoh_0660                       |                  |                                           | 46        | 5                     | 0                             | 14                   | 2                             | 2                    | 1                             |
| Fjoh_0674                       |                  | beta-N-acetylhexosaminidase               | 5         | 0                     | 0                             | 0                    | 0                             | 0                    | 0                             |
| Fjoh_0707                       | TIGR04183        | periplasmic ligand-binding sensor protein | 12        | 2                     | 1                             | 2                    | 4                             | 1                    | 2                             |
| Fjoh_0736                       |                  | SusC-like protein                         | 3         | 0                     | 5                             | 5                    | 2                             | 1                    | 2                             |
| Fjoh_0761                       |                  |                                           | 6         | 0                     | 0                             | 0                    | 0                             | 0                    | 0                             |
| Fjoh_0778                       |                  | glycoside hydrolase                       | 6         | 0                     | 0                             | 0                    | 0                             | 0                    | 0                             |
| Fjoh_0798                       | TIGR04183        | proprotein convertase                     | 19        | 8                     | 17                            | 12                   | 8                             | 4                    | 19                            |
| Fjoh_0846                       |                  |                                           | 15        | 1                     | 0                             | 4                    | 1                             | 0                    | 0                             |
| Fjoh_0959                       |                  | endothelin-converting protein 1           | 133       | 52                    | 47                            | 52                   | 44                            | 63                   | 55                            |
| Fjoh_0979/<br>SprB <sup>c</sup> | TIGR04131        | motility adhesin                          | 98        | 25                    | 58                            | 62                   | 58                            | 60                   | 65                            |
| Fjoh_1190                       |                  | peptidase                                 | 107       | 36                    | 14                            | 41                   | 35                            | 26                   | 27                            |
| Fjoh_1191                       |                  | peptidase                                 | 108       | 15                    | 14                            | 26                   | 21                            | 23                   | 33                            |
| Fjoh_1209                       |                  | Glycoside hydrolase                       | 29        | 0                     | 1                             | 4                    | 1                             | 1                    | 3                             |
| Fjoh_1313                       |                  | prolyl oligopeptidase                     | 162       | 56                    | 60                            | 65                   | 44                            | 78                   | 74                            |
| Fjoh_1348                       |                  | peptidase                                 | 18        | 0                     | 0                             | 0                    | 0                             | 0                    | 0                             |
| Fjoh_1399                       |                  | alpha amylase                             | 14        | 0                     | 0                             | 0                    | 0                             | 2                    | 1                             |
| Fjoh_1400                       |                  |                                           | 41        | 3                     | 4                             | 6                    | 2                             | 5                    | 5                             |

|           |  |                               |     |    |    |    |    |    |    |
|-----------|--|-------------------------------|-----|----|----|----|----|----|----|
| Fjoh_1430 |  | carboxyl-terminal protease    | 85  | 28 | 0  | 32 | 12 | 12 | 24 |
| Fjoh_1434 |  |                               | 27  | 0  | 0  | 0  | 0  | 0  | 0  |
| Fjoh_1543 |  | peptidase                     | 50  | 9  | 0  | 22 | 4  | 0  | 2  |
| Fjoh_1564 |  | glycoside hydrolase           | 30  | 0  | 0  | 2  | 0  | 3  | 13 |
| Fjoh_1567 |  | glycoside hydrolase           | 76  | 8  | 3  | 17 | 3  | 14 | 32 |
| Fjoh_1773 |  | aminopeptidase                | 104 | 21 | 9  | 25 | 14 | 22 | 37 |
| Fjoh_1993 |  | alpha-glucuronidase           | 14  | 0  | 0  | 0  | 0  | 0  | 0  |
| Fjoh_2039 |  | beta-N-acetylhexosaminidase   | 26  | 0  | 1  | 1  | 0  | 0  | 1  |
| Fjoh_2041 |  | alpha-1,2-mannosidase         | 12  | 0  | 0  | 0  | 0  | 0  | 1  |
| Fjoh_2042 |  | glycoside hydrolase           | 35  | 0  | 1  | 1  | 1  | 4  | 1  |
| Fjoh_2253 |  | peptidase                     | 73  | 8  | 5  | 18 | 3  | 18 | 14 |
| Fjoh_2585 |  |                               | 11  | 2  | 1  | 3  | 3  | 1  | 2  |
| Fjoh_2592 |  | OstA family protein           | 18  | 1  | 0  | 3  | 0  | 0  | 3  |
| Fjoh_2593 |  | alpha amylase                 | 6   | 0  | 0  | 0  | 0  | 0  | 0  |
| Fjoh_2612 |  |                               | 20  | 1  | 0  | 2  | 0  | 1  | 2  |
| Fjoh_2668 |  |                               | 44  | 0  | 0  | 0  | 51 | 0  | 76 |
| Fjoh_2713 |  | glycoside hydrolase           | 9   | 0  | 0  | 0  | 0  | 0  | 1  |
| Fjoh_2715 |  | alpha-1,2-mannosidase         | 20  | 0  | 0  | 0  | 0  | 0  | 1  |
| Fjoh_2867 |  | peptidase                     | 49  | 24 | 19 | 22 | 13 | 36 | 29 |
| Fjoh_2928 |  | peptidase                     | 29  | 1  | 0  | 0  | 1  | 2  | 3  |
| Fjoh_2961 |  | LmbE family protein           | 49  | 0  | 1  | 5  | 6  | 2  | 2  |
| Fjoh_3112 |  |                               | 12  | 0  | 0  | 1  | 0  | 1  | 2  |
| Fjoh_3113 |  | alpha-N-arabinofuranosidase   | 10  | 0  | 0  | 0  | 0  | 0  | 0  |
| Fjoh_3389 |  | glycoside hydrolase           | 15  | 4  | 0  | 3  | 2  | 0  | 0  |
| Fjoh_3392 |  | glycoside hydrolase           | 76  | 14 | 11 | 38 | 9  | 24 | 42 |
| Fjoh_3437 |  | aminopeptidase N-like protein | 40  | 2  | 0  | 3  | 1  | 1  | 1  |
| Fjoh_3861 |  | glycoside hydrolase           | 33  | 0  | 0  | 1  | 0  | 0  | 1  |
| Fjoh_3883 |  | glycoside hydrolase           | 21  | 0  | 0  | 0  | 0  | 0  | 0  |
| Fjoh_4076 |  |                               | 5   | 0  | 0  | 0  | 0  | 0  | 0  |
| Fjoh_4080 |  | alpha-L-rhamnosidase          | 24  | 0  | 0  | 0  | 0  | 0  | 0  |
| Fjoh_4085 |  | alpha-L-rhamnosidase          | 5   | 0  | 0  | 0  | 0  | 0  | 0  |
| Fjoh_4086 |  |                               | 7   | 0  | 0  | 0  | 0  | 0  | 1  |
| Fjoh_4097 |  |                               | 18  | 0  | 0  | 0  | 0  | 0  | 0  |
| Fjoh_4098 |  |                               | 9   | 0  | 0  | 0  | 0  | 0  | 0  |
| Fjoh_4198 |  | glycoside hydrolase           | 14  | 0  | 0  | 1  | 0  | 0  | 0  |
| Fjoh_4200 |  | aldehyde oxidase and          | 15  | 0  | 1  | 2  | 0  | 0  | 7  |

|                                 |  |                                  |     |    |     |    |     |     |     |
|---------------------------------|--|----------------------------------|-----|----|-----|----|-----|-----|-----|
|                                 |  | xanthine dehydrogenase           |     |    |     |    |     |     |     |
| Fjoh_4429                       |  |                                  | 34  | 0  | 0   | 4  | 0   | 0   | 5   |
| Fjoh_4430                       |  | alpha-glucosidase                | 11  | 0  | 0   | 0  | 0   | 0   | 1   |
| Fjoh_4555/<br>ChiA <sup>T</sup> |  | chitinase                        | 34  | 18 | 308 | 21 | 103 | 491 | 440 |
| Fjoh_4558                       |  | SusD-like protein                | 12  | 6  | 9   | 3  | 8   | 39  | 42  |
| Fjoh_4602                       |  | peptidase                        | 7   | 0  | 0   | 0  | 1   | 0   | 2   |
| Fjoh_4808                       |  | beta-N-<br>acetylhexosaminidase  | 103 | 9  | 3   | 13 | 3   | 3   | 9   |
| Fjoh_4809                       |  |                                  | 6   | 0  | 0   | 0  | 0   | 0   | 0   |
| Fjoh_4868                       |  | aminopeptidase N-like<br>protein | 52  | 5  | 4   | 12 | 7   | 10  | 17  |
| Fjoh_4963                       |  | glycoside hydrolase              | 15  | 1  | 0   | 1  | 1   | 0   | 2   |
| Fjoh_5032                       |  | prolyl oligopeptidase            | 60  | 21 | 9   | 29 | 16  | 26  | 23  |

**Proteins that were apparently not secreted by the T9SS: These proteins were not greatly decreased in culture fluid of  $\Delta gldNO$  mutant cells.**

| Locus tag/Protein name | CTD <sup>b</sup> | Predicted protein function <sup>c</sup>    | Wild type | $\Delta gldNO$ | $\Delta gldNO$ + pTB79 | $\Delta porV$ | $\Delta porV$ + pSSK03 | $\Delta porU$ | $\Delta porU$ + pSSK04 |
|------------------------|------------------|--------------------------------------------|-----------|----------------|------------------------|---------------|------------------------|---------------|------------------------|
| Fjoh_0024              |                  | threonyl-tRNA synthetase                   | 13        | 26             | 8                      | 30            | 4                      | 6             | 13                     |
| Fjoh_0099              |                  | carbamoyl phosphate synthase large subunit | 1         | 8              | 0                      | 10            | 0                      | 0             | 0                      |
| Fjoh_0112              |                  | phosphoglucomutase                         | 7         | 17             | 2                      | 12            | 1                      | 9             | 9                      |
| Fjoh_0184              |                  | SusD-like protein                          | 0         | 0              | 0                      | 0             | 0                      | 2             | 6                      |
| Fjoh_0237              |                  |                                            | 0         | 5              | 0                      | 4             | 0                      | 0             | 0                      |
| Fjoh_0251              |                  | arginyl-tRNA synthetase                    | 0         | 10             | 0                      | 13            | 0                      | 0             | 0                      |
| Fjoh_0260              |                  | heat shock protein 90                      | 0         | 17             | 0                      | 20            | 0                      | 0             | 0                      |
| Fjoh_0394              |                  | 50S ribosomal protein L2                   | 0         | 5              | 0                      | 2             | 0                      | 0             | 0                      |
| Fjoh_0399              |                  | elongation factor G                        | 0         | 27             | 0                      | 44            | 0                      | 0             | 0                      |
| Fjoh_0403              |                  | SusC-like protein                          | 11        | 6              | 8                      | 3             | 13                     | 3             | 2                      |
| Fjoh_0405              |                  |                                            | 4         | 7              | 2                      | 5             | 4                      | 6             | 5                      |
| Fjoh_0429              |                  | oligopeptidase A                           | 14        | 17             | 9                      | 18            | 10                     | 12            | 18                     |
| Fjoh_0445              |                  | glycine dehydrogenase                      | 15        | 21             | 16                     | 24            | 15                     | 16            | 18                     |
| Fjoh_0603              |                  |                                            | 0         | 0              | 1                      | 28            | 0                      | 1             | 0                      |
| Fjoh_0609              |                  |                                            | 2         | 0              | 2                      | 1             | 4                      | 3             | 6                      |
| Fjoh_0704              |                  | isoleucyl-tRNA synthetase                  | 16        | 24             | 1                      | 32            | 3                      | 8             | 10                     |
| Fjoh_0822              |                  | glucosamine-fructose-6-phosphate           | 0         | 10             | 0                      | 11            | 0                      | 0             | 0                      |

|                    |  |                                                                   |    |    |    |    |    |    |    |
|--------------------|--|-------------------------------------------------------------------|----|----|----|----|----|----|----|
|                    |  | aminotransferase                                                  |    |    |    |    |    |    |    |
| Fjoh_0823          |  |                                                                   | 6  | 7  | 7  | 7  | 8  | 20 | 16 |
| Fjoh_0857          |  | methionyl-tRNA synthetase                                         | 0  | 4  | 0  | 8  | 0  | 0  | 0  |
| Fjoh_0980/<br>SprD |  | motility protein                                                  | 29 | 23 | 1  | 1  | 0  | 0  | 0  |
| Fjoh_1012          |  | glutaminyl-tRNA synthetase                                        | 0  | 6  | 0  | 10 | 0  | 0  | 0  |
| Fjoh_1130          |  | amidophosphoribosyltransferase                                    | 1  | 8  | 1  | 12 | 2  | 4  | 3  |
| Fjoh_1248          |  | aspartyl-tRNA synthetase                                          | 0  | 6  | 0  | 14 | 0  | 0  | 0  |
| Fjoh_1255          |  | dehydrogenase                                                     | 0  | 5  | 0  | 3  | 0  | 0  | 0  |
| Fjoh_1256          |  | 2-oxoglutarate dehydrogenase                                      | 0  | 23 | 0  | 28 | 0  | 0  | 0  |
| Fjoh_1262          |  | alpha,alpha-trehalase                                             | 11 | 22 | 16 | 17 | 12 | 22 | 16 |
| Fjoh_1419          |  | peptidase                                                         | 7  | 15 | 0  | 9  | 1  | 5  | 2  |
| Fjoh_1444          |  | polynucleotide phosphorylase                                      | 13 | 17 | 3  | 24 | 9  | 7  | 6  |
| Fjoh_1494          |  | aspartate kinase                                                  | 0  | 0  | 0  | 5  | 0  | 0  | 0  |
| Fjoh_1504          |  | sulfite reductase                                                 | 4  | 5  | 0  | 5  | 1  | 3  | 3  |
| Fjoh_1551          |  | peptidase                                                         | 0  | 4  | 3  | 2  | 3  | 8  | 7  |
| Fjoh_1552          |  | pyruvate dehydrogenase complex dihydrolipoamide acetyltransferase | 0  | 17 | 0  | 15 | 0  | 0  | 0  |
| Fjoh_1568          |  |                                                                   | 5  | 6  | 1  | 9  | 4  | 7  | 10 |
| Fjoh_1608          |  | peptidyl-dipeptidase Dcp                                          | 1  | 7  | 0  | 5  | 0  | 1  | 2  |
| Fjoh_1651          |  | malic enzyme                                                      | 2  | 17 | 2  | 21 | 0  | 0  | 0  |
| Fjoh_1722          |  |                                                                   | 3  | 11 | 1  | 7  | 1  | 4  | 3  |
| Fjoh_1753          |  | delta-1-pyrroline-5-carboxylate dehydrogenase                     | 1  | 9  | 0  | 6  | 14 | 4  | 1  |
| Fjoh_1764          |  | phosphoglyceromutase                                              | 0  | 7  | 0  | 3  | 5  | 6  | 0  |
| Fjoh_1842          |  | chaperonin GroEL                                                  | 4  | 98 | 0  | 63 | 14 | 1  | 4  |
| Fjoh_1851          |  | DNA topoisomerase I                                               | 0  | 8  | 0  | 6  | 1  | 0  | 0  |
| Fjoh_1894          |  | alanyl-tRNA synthetase                                            | 0  | 3  | 0  | 10 | 0  | 0  | 0  |
| Fjoh_1908          |  | urocanate hydratase                                               | 0  | 6  | 2  | 6  | 0  | 5  | 1  |
| Fjoh_1919          |  | lysyl-tRNA synthetase                                             | 11 | 18 | 8  | 13 | 5  | 8  | 9  |
| Fjoh_1943          |  | DNA-directed RNA polymerase subunit beta                          | 0  | 12 | 0  | 21 | 0  | 0  | 1  |
| Fjoh_1944          |  | DNA-directed RNA                                                  | 0  | 22 | 0  | 27 | 0  | 0  | 0  |



|           |           |                                                                  |     |     |    |     |    |     |     |
|-----------|-----------|------------------------------------------------------------------|-----|-----|----|-----|----|-----|-----|
|           |           | polymerase subunit beta'                                         |     |     |    |     |    |     |     |
|           |           | bifunctional aconitate hydratase/ 2-methylisocitrate dehydratase |     |     |    |     |    |     |     |
| Fjoh_1951 |           |                                                                  | 2   | 22  | 0  | 23  | 0  | 0   | 1   |
| Fjoh_1952 |           | aconitate hydratase                                              | 2   | 8   | 3  | 14  | 2  | 4   | 5   |
| Fjoh_2058 |           |                                                                  | 111 | 177 | 86 | 176 | 66 | 110 | 115 |
| Fjoh_2059 |           |                                                                  | 48  | 118 | 39 | 120 | 24 | 73  | 79  |
| Fjoh_2067 |           |                                                                  | 25  | 145 | 29 | 136 | 22 | 61  | 57  |
| Fjoh_2068 |           |                                                                  | 1   | 110 | 5  | 91  | 10 | 23  | 22  |
| Fjoh_2181 |           | isocitrate dehydrogenase                                         | 42  | 55  | 32 | 63  | 29 | 45  | 51  |
| Fjoh_2278 |           | valyl-tRNA synthetase                                            | 0   | 2   | 0  | 6   | 0  | 0   | 0   |
| Fjoh_2456 | TIGR04183 | pectate lyase                                                    | 0   | 0   | 5  | 0   | 0  | 2   | 2   |
| Fjoh_2556 |           | oligopeptidase B                                                 | 0   | 5   | 0  | 6   | 0  | 0   | 1   |
| Fjoh_2584 |           | DNA gyrase subunit A                                             | 0   | 14  | 0  | 14  | 0  | 0   | 0   |
| Fjoh_2587 |           |                                                                  | 0   | 7   | 0  | 5   | 0  | 0   | 0   |
| Fjoh_2631 |           | chaperone DnaK                                                   | 7   | 45  | 0  | 53  | 0  | 1   | 1   |
| Fjoh_2703 |           |                                                                  | 1   | 0   | 1  | 0   | 2  | 0   | 5   |
| Fjoh_2762 |           | 30S ribosomal protein S1                                         | 0   | 37  | 0  | 41  | 0  | 0   | 0   |
| Fjoh_2916 |           | ABC transporter ATP-binding protein                              | 0   | 9   | 0  | 14  | 0  | 0   | 0   |
| Fjoh_2968 |           | phenylalanyl-tRNA synthetase subunit beta                        | 2   | 5   | 3  | 8   | 1  | 3   | 1   |
| Fjoh_3203 | TIGR04183 |                                                                  | 1   | 0   | 5  | 0   | 0  | 6   | 5   |
| Fjoh_3247 |           |                                                                  | 1   | 3   | 29 | 0   | 2  | 1   | 17  |
| Fjoh_3422 |           | ATPase                                                           | 0   | 14  | 0  | 18  | 0  | 0   | 0   |
| Fjoh_3475 |           | NAD-dependent DNA ligase                                         | 0   | 6   | 0  | 4   | 0  | 1   | 3   |
| Fjoh_3818 |           |                                                                  | 1   | 0   | 5  | 0   | 7  | 0   | 7   |
| Fjoh_3881 |           | SusD-like protein                                                | 2   | 3   | 3  | 5   | 2  | 15  | 10  |
| Fjoh_4094 |           | SusD-like protein                                                | 3   | 3   | 6  | 9   | 6  | 26  | 30  |
| Fjoh_4512 |           | transketolase domain-containing protein                          | 7   | 16  | 0  | 22  | 1  | 6   | 5   |
| Fjoh_4556 |           | beta-N-acetylhexosaminidase                                      | 0   | 1   | 0  | 9   | 0  | 0   | 0   |
| Fjoh_4557 |           | glucosamine-6-phosphate deaminase                                | 10  | 23  | 7  | 24  | 0  | 17  | 15  |
| Fjoh_4720 |           |                                                                  | 0   | 5   | 1  | 2   | 1  | 2   | 0   |
| Fjoh_4721 | TIGR04183 | endonuclease I                                                   | 1   | 0   | 7  | 0   | 2  | 14  | 9   |

|           |           |                                     |    |    |    |    |   |    |    |
|-----------|-----------|-------------------------------------|----|----|----|----|---|----|----|
| Fjoh_4723 | TIGR04183 | endonuclease I                      | 2  | 1  | 17 | 0  | 7 | 21 | 24 |
| Fjoh_4753 |           | 3-hydroxyacyl-CoA dehydrogenase     | 5  | 14 | 3  | 13 | 1 | 5  | 7  |
| Fjoh_4756 |           | acyl-CoA dehydrogenase              | 0  | 6  | 0  | 7  | 0 | 0  | 0  |
| Fjoh_4812 |           | glucosamine-6-phosphate deaminase   | 14 | 25 | 12 | 27 | 3 | 23 | 18 |
| Fjoh_5004 |           | preprotein translocase subunit SecA | 0  | 2  | 0  | 7  | 0 | 0  | 0  |
| Fjoh_5006 |           |                                     | 3  | 5  | 1  | 3  | 2 | 1  | 1  |
| Fjoh_5040 |           |                                     | 1  | 4  | 1  | 5  | 1 | 2  | 2  |

<sup>a</sup> Proteins in cell-free culture fluid from wild type *F. johnsoniae* CJ1827,  $\Delta$ *gldNO* mutant CJ2090,  $\Delta$ *porV* mutant CJ2130,  $\Delta$ *porU* mutant CJ2116,  $\Delta$ *gldNO* complemented with pTB79,  $\Delta$ *porV* complemented with pSSK03, and  $\Delta$ *porU* complemented with pSSK04 were separated by SDS-PAGE, silver stained, and the regions shown in Figure 9 spanning approximately 60 to 240 kDa were cut from the gel and analyzed by LC-MS/MS. Total/unweighted spectrum counts corresponding to total number of spectra associated to a single protein and indicative of relative abundance of that protein are indicated for each of the 7 strains analyzed.

<sup>b</sup> CTD-type identified by BLASTP analysis.

<sup>c</sup> Predicted protein functions as listed on the Integrated Microbial Genomes website (<https://img.jgi.doe.gov>).

<sup>d</sup> The small number of spectra identified from wild type cells for these proteins made the prediction of secretion by the T9SS less certain. These proteins were included because no spectra were observed from  $\Delta$ *gldNO* or  $\Delta$ *porV* mutant cells and because complementation of the  $\Delta$ *gldNO* mutant resulted in 4 to 7 spectral hits for each protein.

<sup>e</sup> SprB is an abundant protein that is secreted by the T9SS but it remains attached to the cell surface rather than being released into the culture fluid (A Shrivastava et al. 2013. *J. Bacteriol.* 195: 3201-3212). This explains why it did not behave like a typical soluble secreted protein in this assay.

<sup>f</sup> ChiA has been shown to be secreted by the T9SS (see SS Kharade and MJ McBride. 2014. *J. Bacteriol.* 196:961-970). We do not know why ChiA did not behave more convincingly like a secreted protein in this analysis. The most intense band between 60 and 240 kDa in cell-free culture fluid of wild type cells (at approximately 90 kDa) was composed primarily of ChiA, and this band was not present in culture fluid of cells of the  $\Delta$ *gldNO* mutant suggesting that ChiA is secreted by the T9SS (see Figure S1 in the supplemental material for this paper).

**A**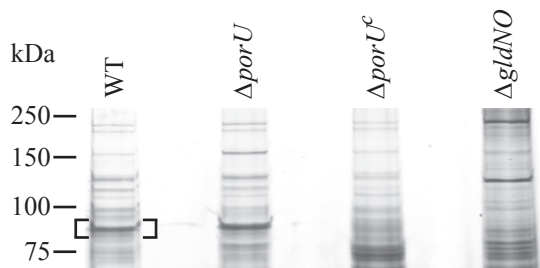**B**

```

1 MKHYRLLFLLLFLLASAQPAHGKKVVGYAQWSIYARDFNVPKIDGSK
51 LTHLNYSFYGTTYDPAHEPENTKLIKCLDTYADFEHMEGGIPWDAFVKGNFY
101 DLMLKQKYPHLKILISVGGWTKGQDLSPIAASPVARAALAADMANFIV
151 YPFIDGFDIDWEYPLSGGTDGTEIVNGMFPVPPQKYSPDDNKNLVLLKAM
201 RQAMPNKLVTIAAGNNVRNVSKQYLGPNRAQYGMTEISTYCDYITYFG
251 YDFGGNWYDKTCYNAPLYASGNPNDPLYGATQSESLDELTNQYLVNIGFP
301 ANKLIMGLPFYGKFKFDNVAANSTNGLFVAAPRYIVPGCTNPQNPTGTWDG
351 SGACEKSGSIEICDLVGNPVTNSHAYLDPNTMMVTPSAASAGWVRYFDNT
401 TKVPYLYNSTLQKFISYEDKQSMDLKVQIKSRNLLAGMIWELSQDTRGS
451 IPNSLLNQVDTSFGSVVPGTVSISGSVKNGSALVTDVTVELRNASNAVIQ
501 TVVSANGNFAFNLLTSGQNYSLTALKATYTFFTPVTLVNVTVNQTAVVING
551 TQPTYTVSGTVLDGSTPVSGVTVTAVSGSTTLTAVSNASGVYSIAGLTAG
601 LNFTVTAAKSGFSYAPASTVYNAIDSNKTLNFTQGAPVVNYTVSGTVLNS
651 TTPVSGVTVTASFTGGSYAAVTNASGTYSLSLSPGGNYTVTAALTGQTFT
701 PASTVYSNLNANKTLNFTQDVVSTSKISGTVKNGTNPVAGAKVELVLPW
751 TDNTHNWSVIAATDAQGYKYSFDNSVVDGYTQVLSLKLNSWQNGEVAYYP
801 NNLANFAVPANPTVYNFNTSSTAKSALAAAANLISGTVKNGTTPVAGAKV
851 EIVLPWTDNTHNWSVLATTDASGNYSFDNSVVAGYTQILSLKLNGWENG
901 DVTYYPNNLANFAVPTTPTIYFNRQAVVATKPVVITAPTASAIAINLG
951 SAINFVASVGLSAVDATTISSVVFLDGGQSLSTANSSGTYTAAWTPAANQ
1001 FLSHTLTVTATASNGTTDSKTYSFTLTCSGANCPNALPVITWNSPSNTT
1051 VYQNTFQVVPISVTAVSDGTVSGVTITINGGTFNMTAGTNNTYTYNFTP
1101 SAYQDYPVVIKATDNKSGVTTLNNTIKIATVSTNRFIPLPSKIILGYAS
1151 WENAGAPFLYFSQMVGSKFNVVDYSFVETVNRDGYTPLLTTNDTRYLTNG
1201 VFNKQLLKNDIKSLRDSGVPVIVSIGGQNGHVLDNVTQKNIFVNLKAI
1251 IDEYQFDGVDIDFEGGSMNFNAGLRDISYAGISAYPRLKNVDAFKELK
1301 AYYGPGFLLTAAPETQYVQGGYTTYTDTFGSFLPIIQNLRNELDLLAVQL
1351 YNTGGENGLDGQYYGTAKKSNMVTALTDMVIKGYNIASTGMRFDGLPASK
1401 VLIALPACPSAAGSGYLTPTEGINAMHYLRTGTFSGRTYTMQPGGPYPS
1451 LRGLMTWSVNWDASSCGNSSELSKAYAYFASQTAAKTLVLDDISAKSNA
1501 TIAYFKNNALSVTNENEDIAQVDVFNVLGQNLVSHRNVQNNKEVLLHNQS
1551 FSSKQLFLVVVTDKAGNKSKFKVMNFLN

```

Figure S1. The approximately 90 kDa protein present in culture fluid of wild-type cells but not in culture fluid of the *ΔgldNO* mutant corresponds to the N-terminal portion of ChiA. A) Cell-free spent medium from wild-type cells (WT) and from cells of the *ΔporU* mutant, *ΔporU* mutant complemented with pSSK04, and *ΔgldNO* mutant were separated by SDS-PAGE and proteins were detected by silver staining. The approximately 90 kDa band that was present in the cell-free culture fluid of wild-type cells (bracketed) but was not present in culture fluid of the *ΔgldNO* mutant was cut from the gel and subjected to LC-MS/MS analysis. B) The primary amino acid sequence of ChiA is shown, with the regions detected by LC-MS/MS highlighted in red. 469 spectral matches were detected to ChiA. All of these except for 3 fell between amino acids 26 and 864, which corresponds to the amino-proximal region of the protein after removal of the signal peptide. ChiA has previously been shown to be processed into N-terminal and C-terminal fragments, each of which has a chitinase catalytic domain (SS Kharade and MJ McBride. 2014. *J. Bacteriol.* **196**:961-970).
